# Supplementary material
Source: PubMed Central journal article supplement (PMC4873337)
Supplement: NIHMS774096-supplement-2.pdf [file NIHMS774096-supplement-2.pdf]

**Supplemental Table 1. CD4+ lineage-associated gene set**

| ProbeSetID | GeneSymbol | Description                                                                                                | CD4 (T_4SP24-<br>_Th) | CD8 (T_8SP24-<br>_Th) | Expression ratio<br>(CD4/CB8) |
|------------|------------|------------------------------------------------------------------------------------------------------------|-----------------------|-----------------------|-------------------------------|
| 10547894   | Cd4        | CD4 antigen                                                                                                | 2132.7                | 40.7                  | 52.405                        |
| 10499612   | Zbtb7b     | zinc finger and BTB domain containing 7B                                                                   | 1524.3                | 85.9                  | 17.750                        |
| 10480238   | St8sia6    | sialyltransferase 6                                                                                        | 368.3                 | 34.6                  | 10.647                        |
| 10402268   | Lgmn       | legumain                                                                                                   | 394.7                 | 49.7                  | 7.936                         |
| 10599802   | Cd40lg     | CD40 ligand                                                                                                | 149.7                 | 23.8                  | 6.301                         |
| 10381809   | Itgb3      | integrin beta 3                                                                                            | 1242.8                | 228.5                 | 5.438                         |
| 10423293   | Myo10      | myosin X                                                                                                   | 272.1                 | 57.9                  | 4.701                         |
| 10511282   | Tnfrsf4    | tumor necrosis factor receptor<br>superfamily member 4                                                     | 566.2                 | 126.3                 | 4.484                         |
| 10425207   | H1f0       | H1 histone family member 0                                                                                 | 393.1                 | 87.9                  | 4.472                         |
| 10469278   | Il2ra      | interleukin 2 receptor alpha chain                                                                         | 141.6                 | 34.2                  | 4.145                         |
| 10606369   | Itm2a      | integral membrane protein 2A                                                                               | 2853.0                | 692.6                 | 4.119                         |
| 10469151   | Itih5      | inter-alpha (globulin) inhibitor H5                                                                        | 145.9                 | 37.6                  | 3.878                         |
| 10496438   | Adh1       | alcohol dehydrogenase 1 (class I)                                                                          | 198.8                 | 51.7                  | 3.844                         |
| 10590365   | Vipr1      | vasoactive intestinal peptide receptor 1                                                                   | 751.3                 | 199.2                 | 3.772                         |
| 10550394   | Ptgir      | prostaglandin I receptor (IP)                                                                              | 248.8                 | 70.2                  | 3.544                         |
| 10503410   | Tmem64     | transmembrane protein 64                                                                                   | 1067.0                | 307.6                 | 3.469                         |
| 10427035   | Nr4a1      | nuclear receptor subfamily 4 group A<br>member 1                                                           | 1434.2                | 415.0                 | 3.456                         |
| 10407435   | Akr1c18    | aldo-keto reductase family 1 member C18                                                                    | 50.7                  | 15.6                  | 3.258                         |
| 10435907   | Cd200r1    | CD200 receptor 1                                                                                           | 80.0                  | 25.2                  | 3.169                         |
| 10363541   | Ass1       | argininosuccinate synthetase 1                                                                             | 1531.4                | 490.5                 | 3.122                         |
| 10511363   | Penk       | preproenkephalin                                                                                           | 82.3                  | 26.6                  | 3.099                         |
| 10471154   | Ass1       | argininosuccinate synthetase 1                                                                             | 1429.9                | 469.9                 | 3.043                         |
| 10605113   | L1cam      | L1 cell adhesion molecule                                                                                  | 232.7                 | 78.8                  | 2.952                         |
| 10585286   | Arhgap20   | Rho GTPase activating protein 20                                                                           | 107.5                 | 36.5                  | 2.948                         |
| 10533345   | Aldh2      | aldehyde dehydrogenase 2 mitochondrial                                                                     | 230.2                 | 78.1                  | 2.946                         |
| 10590242   | Ccr8       | chemokine (C-C motif) receptor 8                                                                           | 468.2                 | 160.5                 | 2.917                         |
| 10402708   | Ckb        | creatine kinase brain                                                                                      | 509.5                 | 175.6                 | 2.902                         |
| 10500204   | Ecm1       | extracellular matrix protein 1                                                                             | 492.0                 | 172.0                 | 2.861                         |
| 10576639   | Nrp1       | neuropilin 1                                                                                               | 123.6                 | 43.8                  | 2.822                         |
| 10555174   | Lrrc32     | leucine rich repeat containing 32                                                                          | 224.5                 | 80.1                  | 2.803                         |
| 10429564   | Ly6a       | lymphocyte antigen 6 complex locus A                                                                       | 1414.2                | 509.0                 | 2.778                         |
| 10403821   | Tcrp-V3    | T-cell receptor gamma variable 3                                                                           | 206.3                 | 74.3                  | 2.777                         |
| 10346783   | Cd28       | CD28 antigen                                                                                               | 1345.7                | 486.3                 | 2.767                         |
| 10407940   | Tcrp-V2    | NLR family apoptosis inhibitory protein 3                                                                  | 227.9                 | 82.9                  | 2.750                         |
| 10593225   | Zbtb16     | zinc finger and BTB domain containing 16                                                                   | 157.6                 | 57.8                  | 2.729                         |
| 10554863   | Syt12      | synaptotagmin-like 2                                                                                       | 169.0                 | 62.2                  | 2.718                         |
| 10422028   | Tbcd14     | TBC1 domain family member 4                                                                                | 115.8                 | 45.3                  | 2.559                         |
| 10575534   | St3gal2    | sialyltransferase 2                                                                                        | 199.6                 | 78.4                  | 2.546                         |
| 10467110   | Lipo1      | expressed sequence AI747699                                                                                | 112.3                 | 44.1                  | 2.544                         |
| 10502791   | Ifi44      | interferon-induced protein 44                                                                              | 230.5                 | 91.7                  | 2.514                         |
| 10547100   | Plxnd1     | plexin D1                                                                                                  | 276.1                 | 109.8                 | 2.514                         |
| 10414914   | Trav14n-3  | ---                                                                                                        | 120.1                 | 48.3                  | 2.486                         |
| 10492815   | Tmem154    | transmembrane protein 154                                                                                  | 284.8                 | 116.0                 | 2.455                         |
| 10353450   | Gm4956     | predicted gene 4956                                                                                        | 66.4                  | 27.2                  | 2.442                         |
| 10579347   | Ifi30      | interferon gamma inducible protein 30<br>family with sequence similarity 55 member                         | 589.9                 | 241.7                 | 2.441                         |
| 10439955   | Fam55c     | C                                                                                                          | 1239.8                | 517.6                 | 2.395                         |
| 10479981   | Gata3      | GATA binding protein 3                                                                                     | 1013.9                | 423.5                 | 2.394                         |
| 10556280   | Swap70     | SWA-70 protein                                                                                             | 120.6                 | 50.8                  | 2.376                         |
| 10598292   | Foxp3      | forkhead box P3                                                                                            | 189.6                 | 79.9                  | 2.372                         |
| 10517373   | Rcan3      | regulator of calcineurin 3                                                                                 | 488.4                 | 206.6                 | 2.364                         |
| 10559261   | Cd81       | CD81 antigen                                                                                               | 597.2                 | 254.3                 | 2.348                         |
| 10418341   | Il17rb     | interleukin 17 receptor B<br>myeloid/lymphoid or mixed-lineage<br>leukemia (trithorax homolog Drosophila); | 118.1                 | 50.7                  | 2.331                         |
| 10514255   | Mllt3      | translocated to 3                                                                                          | 980.7                 | 425.0                 | 2.308                         |
| 10417264   | Gm3002     | predicted gene 544988                                                                                      | 77.4                  | 33.6                  | 2.300                         |
| 10379615   | S1fn5      | schlafen 5                                                                                                 | 735.1                 | 321.7                 | 2.285                         |
| 10538356   | Chn2       | chimerin (chimaerin) 2                                                                                     | 373.6                 | 164.4                 | 2.272                         |

|          |              |                                                                                                                     |        |        |       |
|----------|--------------|---------------------------------------------------------------------------------------------------------------------|--------|--------|-------|
| 10346790 | Ctla4        | cytotoxic T-lymphocyte-associated protein 4                                                                         | 159.9  | 70.8   | 2.258 |
| 10483381 | Stk39        | serine/threonine kinase 39 STE20/SPS1 homolog (yeast)                                                               | 418.3  | 186.1  | 2.248 |
| 10373902 | Gatsl3       | GATS protein-like 3                                                                                                 | 302.3  | 135.0  | 2.239 |
| 10455961 | Iigp1        | interferon inducible GTPase 1                                                                                       | 129.9  | 58.1   | 2.237 |
| 10417359 | Gm3002       | hematological and neurological expressed 1-like                                                                     | 75.3   | 33.7   | 2.236 |
| 10441003 | Runx1        | runt related transcription factor 1                                                                                 | 562.7  | 252.3  | 2.230 |
| 10556598 | Xylt1        | xylosyltransferase 1                                                                                                | 366.1  | 165.1  | 2.218 |
| 10532085 | Tgfb3        | transforming growth factor beta receptor III                                                                        | 754.9  | 344.4  | 2.192 |
| 10587315 | Gsta4        | glutathione S-transferase alpha 4                                                                                   | 103.3  | 47.2   | 2.190 |
| 10558001 | Inpp5f       | inositol polyphosphate-5-phosphatase F solute carrier family 25 (mitochondrial carrier phosphate carrier) member 24 | 170.9  | 78.3   | 2.182 |
| 10495405 | Slc25a24     | carrier phosphate carrier) member 24                                                                                | 155.6  | 71.3   | 2.182 |
| 10431410 | Mapk11       | mitogen-activated protein kinase 11                                                                                 | 259.1  | 118.8  | 2.181 |
| 10439790 | Trat1        | T cell receptor associated transmembrane adaptor 1                                                                  | 161.6  | 74.1   | 2.181 |
| 10407792 | Gpr137b-ps   | G protein-coupled receptor 137B pseudogene                                                                          | 88.0   | 40.4   | 2.178 |
| 10412537 | Gm3002       | RIKEN cDNA B930046C15 gene                                                                                          | 65.7   | 30.2   | 2.177 |
| 10560719 | 2210010C17Ri | RIKEN cDNA 2210010C17 gene                                                                                          | 164.1  | 75.6   | 2.172 |
| 10559248 | Tspan32      | tetraspanin 32                                                                                                      | 885.6  | 409.0  | 2.165 |
| 10414784 | Gm26         | gene model 26 (NCBI)                                                                                                | 968.4  | 447.8  | 2.162 |
| 10560709 | Pvr          | poliovirus receptor                                                                                                 | 411.5  | 190.6  | 2.159 |
| 10414738 | LOC547323    | similar to RIKEN cDNA A430107P09 gene                                                                               | 429.2  | 199.8  | 2.148 |
| 10414807 | Trav14-3     | T-cell receptor alpha chain                                                                                         | 692.6  | 323.1  | 2.143 |
| 10445877 | Gm16489      | predicted gene 16489                                                                                                | 299.9  | 140.0  | 2.142 |
| 10467068 | Sgms1        | sphingomyelin synthase 1                                                                                            | 253.3  | 118.7  | 2.135 |
| 10405693 | Dapk1        | death associated protein kinase 1                                                                                   | 190.8  | 89.6   | 2.129 |
| 10417258 | Gm3002       | predicted gene 544988                                                                                               | 57.5   | 27.1   | 2.122 |
| 10504838 | Nr4a3        | nuclear receptor subfamily 4 group A member 3                                                                       | 250.8  | 118.5  | 2.116 |
| 10417235 | Gm2897       | predicted gene 3264                                                                                                 | 49.1   | 23.2   | 2.115 |
| 10508651 | Sdc3         | syndecan 3                                                                                                          | 209.1  | 99.0   | 2.112 |
| 10590974 | Folr4        | folate receptor 4 (delta)                                                                                           | 847.0  | 401.3  | 2.110 |
| 10489051 | 5730471H19R  | RIKEN cDNA 5730471H19 gene                                                                                          | 296.3  | 140.5  | 2.109 |
| 10368947 | Aim1         | absent in melanoma 1                                                                                                | 1157.9 | 549.2  | 2.108 |
| 10402063 | Foxn3        | forkhead box N3                                                                                                     | 639.8  | 303.8  | 2.106 |
| 10386951 | Hs3st3b1     | heparan sulfate (glucosamine) 3-O-sulfotransferase 3B1                                                              | 577.9  | 274.7  | 2.104 |
| 10417226 | Gm3002       |                                                                                                                     | 56.0   | 26.6   | 2.101 |
| 10463836 | Gsto1        | glutathione S-transferase omega 1                                                                                   | 131.9  | 63.0   | 2.094 |
| 10495685 | Arhgap29     | Rho GTPase activating protein 29                                                                                    | 101.7  | 48.6   | 2.093 |
| 10412517 | Gm3002       | predicted gene 10021                                                                                                | 202.1  | 96.7   | 2.090 |
| 10590381 | Vipr1        | vasoactive intestinal peptide receptor 1                                                                            | 200.1  | 95.9   | 2.086 |
| 10447294 | Prkce        | protein kinase C epsilon                                                                                            | 175.6  | 84.6   | 2.076 |
| 10408450 | Sox4         | SRY-box containing gene 4                                                                                           | 444.1  | 216.6  | 2.050 |
| 10484227 | Sestd1       | SEC14 and spectrin domains 1                                                                                        | 75.3   | 36.7   | 2.049 |
| 10417302 | Gm3002       | predicted gene 544988                                                                                               | 56.9   | 27.8   | 2.047 |
| 10570516 | Kbtbd11      | kelch repeat and BTB (POZ) domain containing 11                                                                     | 977.3  | 479.4  | 2.038 |
| 10422496 | Gpr183       | G protein-coupled receptor 183                                                                                      | 542.7  | 266.3  | 2.038 |
| 10417286 | Gm3002       |                                                                                                                     | 58.6   | 28.8   | 2.036 |
| 10404913 | Cap2         | CAP adenylate cyclase-associated protein 2 (yeast)                                                                  | 105.3  | 51.8   | 2.031 |
| 10525419 | P2rx7        | purinergic receptor P2X ligand-gated ion channel 7                                                                  | 160.5  | 79.3   | 2.024 |
| 10548030 | Cd9          | CD9 antigen                                                                                                         | 496.0  | 245.2  | 2.023 |
| 10439651 | Cd200        | CD200 antigen                                                                                                       | 145.5  | 71.9   | 2.022 |
| 10417421 | Gm3696       | hematological and neurological expressed 1-like                                                                     | 61.3   | 30.4   | 2.016 |
| 10466040 | Cd5          | CD5 antigen                                                                                                         | 2925.2 | 1452.6 | 2.014 |
| 10356866 | Pdcd1        | programmed cell death 1                                                                                             | 247.0  | 123.3  | 2.004 |

Microarray data comparing CD4+ and CD8+ single positive mature thymocytes were downloaded from the Immunological Genome project. Genes shown  $\geq 2$  fold higher expression in CD4+ T cells than that in CD8+ T cells were identified.

## Supplemental Table 2. Primers used in quantitative PCR.

### a. Primers for cDNA detection

| Gene symbol    | 5' primer                | 3' primer                |
|----------------|--------------------------|--------------------------|
| <i>Cd40lg</i>  | 5'- GGCAATTTGAAGACCTTGTC | 5'- CTGCATTACTGTTGGCTTCG |
| <i>St8sia6</i> | 5'- GCTACGAGGTGGAAAGCAAG | 5'- TGAGAATTCCCCATTACCA  |
| <i>Lgmn</i>    | 5'- ACACCGGAGAGGATGTGACT | 5'- CCGTGGTCGGTGAAGTAAAT |
| <i>Runx3d</i>  | 5'- CCAACCAAGTGGGTCTGAAC | 5'- GTGCTCGGGTCTCGTATGAA |
| <i>Itgae</i>   | 5'- ATTTGGGGACCCTCTCAATC | 5'- GGTCTGAGGCAATCAGCTTC |
| <i>Nkg7</i>    | 5'- TCCTCACTTCTCTGCCACT  | 5'- GCAAGACAGAACCAGGAAGC |
| <i>Prdm1</i>   | 5'- TGGTATTGTCGGGACTTTGC | 5'- ATTGCTTTGGGTTGCTTTCC |
| <i>Prf1</i>    | 5'- GATGTGAACCCTAGGCCAGA | 5'- GGTTTTTGTACCAGGCGAAA |
| <i>Fasl</i>    | 5'- GCAGAAGGAACTGGCAGAAC | 5'- TTAAATGGGCCACACTCCTC |
| <i>Itgb3</i>   | 5'- TGTCGTCAGCCTTACCAGA  | 5'- GGATTTTCCCGTAAGCATCA |
| <i>Thpok</i>   | 5'- CCCTGCTCGAGTTTGCTTAC | 5'- CTCGCTCACAGTCATCCTCA |
| <i>Gata3</i>   | 5'- CTTATCAAGCCCAAGCGAAG | 5'- CATTAGCGTTCCTCCTCCAG |

### b. Primers for genomic region detection

| Gene symbol             | 5' primer                 | 3' primer                |
|-------------------------|---------------------------|--------------------------|
| <i>Cd4</i> -TSS         | 5'- CAGAACATTCCGGCACATTA  | 5'- CATCTGTGAAGGCAAAGCAA |
| <i>Cd4</i> -silencer    | 5'- GAACCACAAGGGTCGCTTAG  | 5'- CACAGTGACAGCCTGTGGTC |
| <i>St8sia6</i> -TSS     | 5'- CAGAGCATAACGCAGGAGGAG | 5'- GTGGCTCAGGATGAGATCG  |
| <i>Cd40lg</i> -upstream | 5'- GGGATCTTGGTCATAAAGCAG | 5'- CAATGCTGAGTCGGAAATGA |
| <i>Itgb3</i> -TSS       | 5'- CCGGAGCTAGGACTGAGAAG  | 5'- TCCATCTTTCCTCTGCTTCC |
| <i>Thpok</i> -TSS       | 5'- GGAATGCGACTGGTTGAAAT  | 5'- CCTTGGCTCGGGATACACTA |
| <i>Prdm1</i> -TSS       | 5'- TGACGGTCTGATTCACCTCCT | 5'- CCCAGTCCTTGTTGAAATCC |
| <i>Fasl</i> -TSS        | 5'- TCCTAATCCCATTCCAACCA  | 5'- CATCACAACCACTCCCACTG |
